# Supplementary material for: Interactions of phenanthridinium–nucleobase conjugates with polynucleotides in aqueous media. Recognition of poly UElectronic supplementary information (ESI) available: materials and methods and CD titrations. See http://www.rsc.org/suppdata/cc/b2/b202615e/
Source: Royal Society of Chemistry journal article supplement (doi:10.1039/b202615e), 2002-06-05
Supplement: b202615e.doc [file b202615e.doc]

# SUPPLEMENTARY MATERIAL

# Interactions of phenanthridinium-nucleobase conjugates with polynucleotides in aqueous media. Recognition of poly U.

bIva Juranović, bZlatko Meić, aIvo Piantanida*, aLidija-Marija Tumir, aMladen Žinić*

a Laboratory of Supramolecular and Nucleoside Chemistry, Department of Chemistry and Biochemistry, Rudjer Boskovic Institute, HR 10000 Zagreb, P.O.B. 1016, Croatia

b Laboratory of Analytical Chemistry, Department of Chemistry, Faculty of Science, Strossmayerov trg 14, HR 10000 Zagreb, Croatia

## Materials and Methods

Polynucleotides were purchased from Sigma and Aldrich, and used without further purification. Polynucleotides were dissolved in the sodium cacodylate buffer, 0.05 mol dm-3, pH = 7 and their concentration determined spectroscopically12 as the concentration of phosphates. Compounds, prepared and spectroscopically characterised previously,11 were dissolved in sodium cacodylate buffer, 0.05 mol dm-3, pH = 5, all being in a phenanthridinium form. Electron absorption spectra were recorded on a Varian Cary 3 spectrometer using quartz cuvettes (1 cm). Fluorescence spectra were recorded on a Perkin Elmer LS 50 fluorimeter in quartz cuvettes (1 cm). CD spectra were recorded on a JASCO J-715 spectropolarimeter in quartz cuvettes (1 cm), total absorbance at the end of titration being Absmax = 1.5. Spectroscopic titrations were performed at constant ionic strength (sodium chloride, 0.1 mol dm-3) by adding portions of polynucleotide solution into solution of the tested compound. Obtained data were corrected for dilution.In fluorimetric titrations excitation wavelength at **max = 440 nm was used (where possible checked with **exc = 320 nm) and changes in emission at **em = 540 nm (**1**)or**em = 550 nm (**2 - 5**) were monitored. The stability constants (*Ks*) and [bound ligand] / [polynucleotide phosphate] ratio (*n*) were calculated according to the Scatchard equation13 by non-linear least-square fitting method.12 Values for *Ks* and *n* given in Table 2 all have satisfactory correlation coefficients (>0.999).

**Figure 3.** Fluorimetric titrations of **1**, **4** and **5** with poly U, **exc = 440 nm, **em = 540 nm (**1**);**em = 550 nm (**4, 5**), pH = 5 (I=0.1 mol dm-3, Na cacodylate buffer).

**CD titrations**

We also performed CD titrations of poly U (under same conditions as used in UV/Vis experiments) with **4** and **5** following the idea that the bis-intercalative binding of **5**, if present, should produce more pronounced changes of chirality of poly U than the mono-intercalation of **4**. However, no change of poly U CD spectra was observed for both, **4** and **5**, failing to give any definite answer to proposed binding modes. Lack of helical organisation of poly U results with CD spectra dependent more on the chiral properties of uracil than on polynucleotide random coil structure.[[1]](#endnote-2) Since the bis-intercalative binding of **5**, if present, should influence mostly on structural properties of polynucleotide this can explain lack of specific changes in CD spectra of poly U.

1. G.D. Fasman, Circular Dichroism and the Conformational Analysis of Biomolecules, Plenum Press, New York, 1996, chapters 12, 18. [↑](#endnote-ref-2)
